# Supplementary material for: An aptamer-based colorimetric/SERS dual-mode sensing strategy for the detection of sulfadimethoxine residues in animal-derived foods
Source: Royal Society of Chemistry journal article supplement (doi:10.1039/d2ay01825j), 2023-01-01
Supplement: d2ay01825j1.pdf [file d2ay01825j1.pdf]

1  
2  
3  
4  
5  
6  
7  
8  
9  
10  
11  
12  
13  
14  
15  
16  
17

## Supplementary Information

### **An aptamer-based colorimetric/SERS dual-mode sensing strategy for the detection of sulfadimethoxine residues in animal-derived foods**

Nan Zhang,<sup>a</sup> Haiyang Lv,<sup>a</sup> Jihong Wang,<sup>b</sup> Zhanye Yang,<sup>a</sup> Yanru Ding,<sup>a</sup> Bing Zhao,<sup>b</sup>  
and Yuan Tian<sup>\*a</sup>

<sup>a</sup> *College of Chemistry, Jilin Province Research Center for Engineering and  
Technology of Spectral Analytical Instruments, Jilin University, Changchun, 130012,  
P. R. China*

<sup>b</sup> *State Key Laboratory of Supramolecular Structure and Materials, Jilin  
University, Changchun 130012, P. R. China*

*\* Corresponding author.*

*Phone: +86-431-85168473;*

*Fax: +86-431-85193421*

*E-mail: tianyuan@jlu.edu.cn*

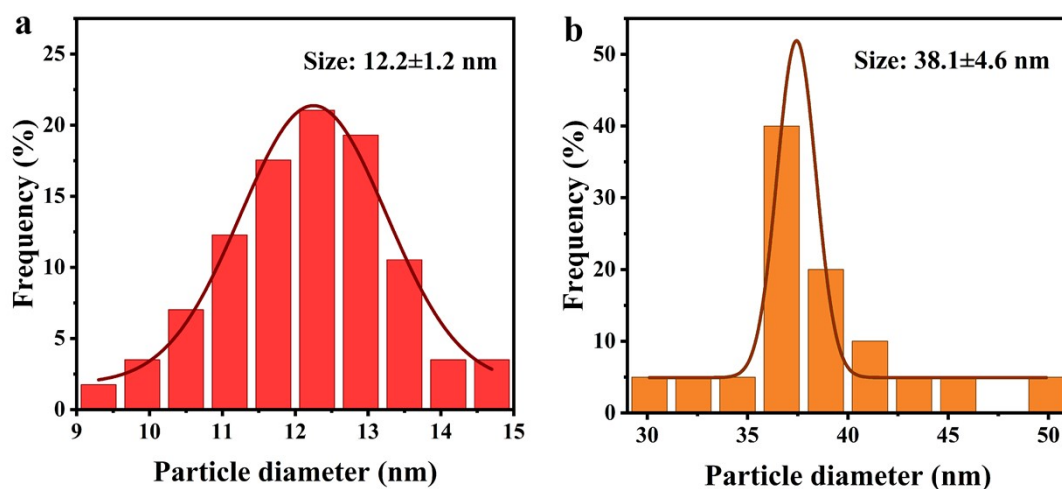

18  
 19 **Fig. S1** (a) Statistical analysis of the diameter distribution of AuNPs determined by  
 20 TEM in Fig 3b. (b) Statistical analysis of the diameter distribution of Au@AgNPs  
 21 determined by TEM in Fig 3b.

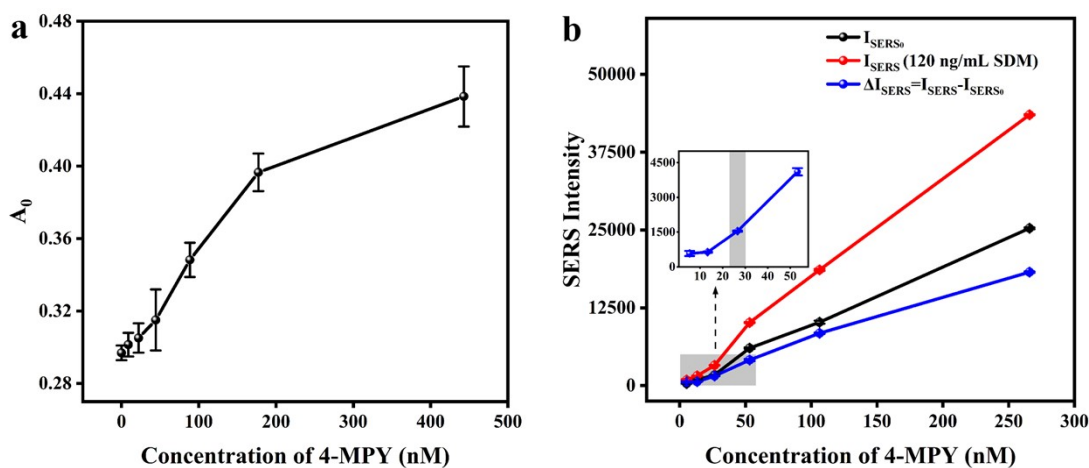

22  
 23 **Fig. S2** (a) Effect of the concentration of 4-MPY on  $A_0$  (the absorbance ratio  $A_{650}/A_{520}$   
 24 of pure AuNPs). (b) Effect of the concentration of 4-MPY on SERS intensity at  
 25  $1007\text{cm}^{-1}$ . (The variation in the SERS intensity of the SERS peak at  $1007\text{ cm}^{-1}$  is  
 26 expressed as  $\Delta I_{\text{SERS}} = I_{\text{SERS}} - I_{\text{SERS}_0}$ , where  $I_{\text{SERS}}$  and  $I_{\text{SERS}_0}$  represent the SERS intensity  
 27 at  $1007\text{ cm}^{-1}$  in the presence and absence of SDM, respectively).

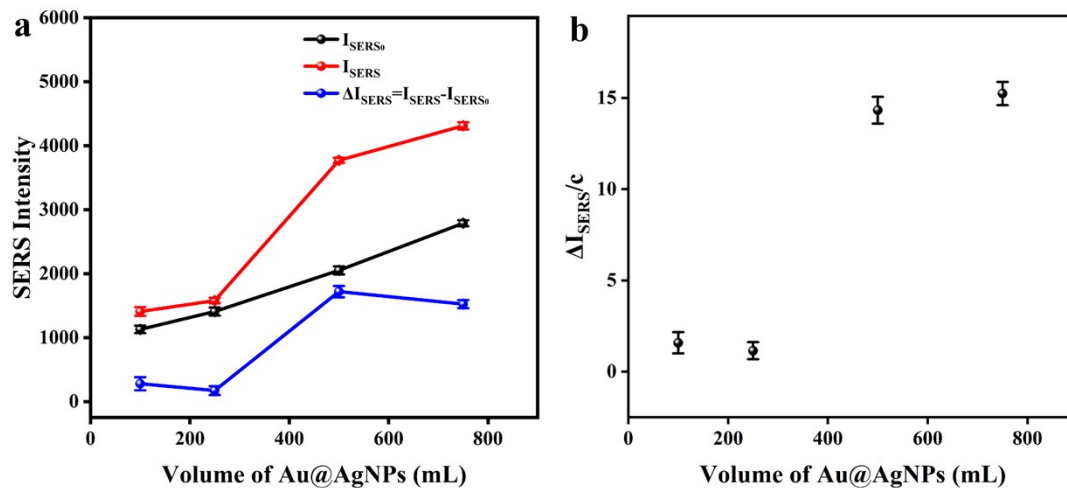

28

29 **Fig. S3** (a) Effect of the volume of Au@AgNPs on SERS intensity at  $1007\text{cm}^{-1}$ . (b)  
 30 Effect of the volume of Au@AgNPs on the estimated slope of the standard curve. The  
 31 error bars represent standard deviations from three parallel measurements.

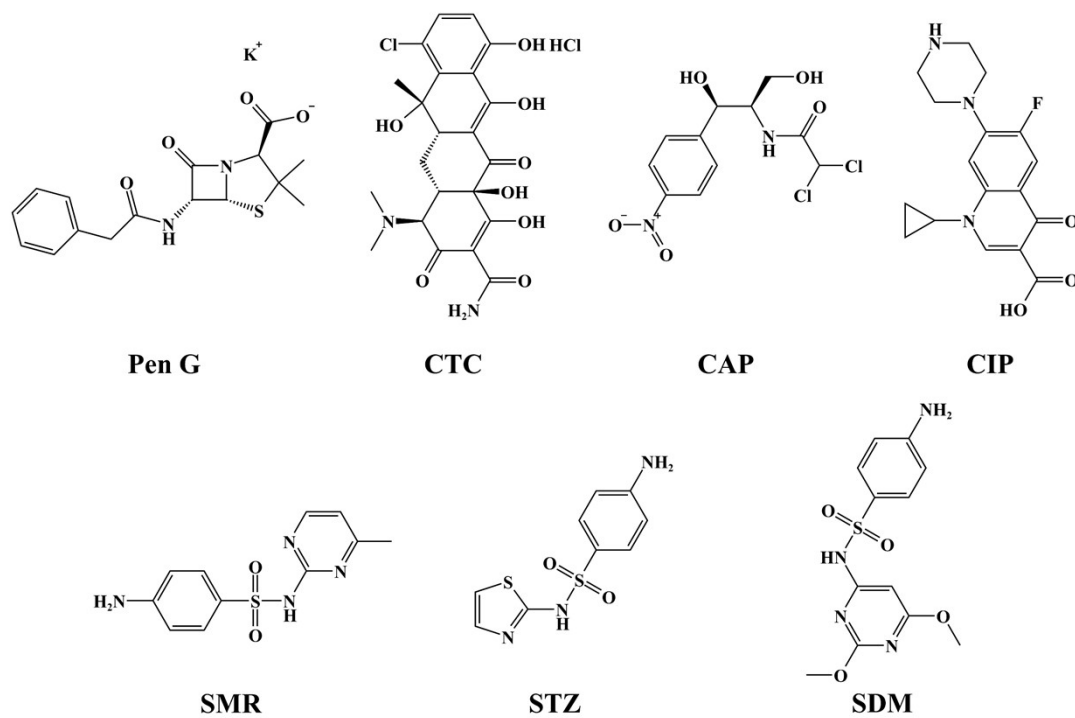

32

33 **Fig. S4** The chemical structures of Penicillin G potassium salt (Pen G),  
 34 chlortetracycline hydrochloride (CTC), Chloramphenicol (CAP), ciprofloxacin (CIP),  
 35 Sulfamerazine (SMR), sulfathiazole (STZ) and sulfadimethoxine (SDM).
